# Supplementary material for: Recyclable low-thermal-conductivity phase change materials for building thermal management
Source: Royal Society of Chemistry journal article supplement (doi:10.1039/d5qm00739a), 2026-01-01
Supplement: d5qm00739a1.pdf [file d5qm00739a1.pdf]

## Supporting Information

### **Recyclable low-thermal-conductivity phase change materials for building thermal management**

Xiaolong Guo <sup>a</sup>, Jin Hu <sup>b,\*</sup>, Haoyang Cheng <sup>a</sup>, Lin Zhang <sup>a</sup>, Kanghui Wang <sup>a</sup>, Bingtao Tang <sup>c</sup>, and Wentao Wang <sup>a,d,\*</sup>

<sup>a</sup> *School of Materials Science and Engineering, Zhejiang Sci-Tech University, Hangzhou 310018, China.*

<sup>b</sup> *School of Chemistry and Pharmaceutical Engineering, Changsha University of Science and Technology, Changsha 410114, China.*

<sup>c</sup> *State Key Laboratory of Fine Chemicals, Dalian University of Technology, Dalian 116024, China.*

<sup>d</sup> *Zhejiang Sci-Tech University Shengzhou Innovation Research Institute, Shengzhou 212451, China.*

\*Correspondence: [jhu@csust.edu.cn](mailto:jhu@csust.edu.cn), [wtwang@zstu.edu.cn](mailto:wtwang@zstu.edu.cn)

**Table S1.** The mass ratios of each component in the PCP CPCMs.

|         | PVA (wt%) | CMC-Na (wt%) | PEG (wt%) | Leakage |
|---------|-----------|--------------|-----------|---------|
| PCP-60% | 32        | 8            | 60        | NO      |
| PCP-70% | 24        | 6            | 70        | NO      |
| PCP-80% | 16        | 4            | 80        | NO      |
| PCP-85% | 12        | 3            | 85        | YES     |

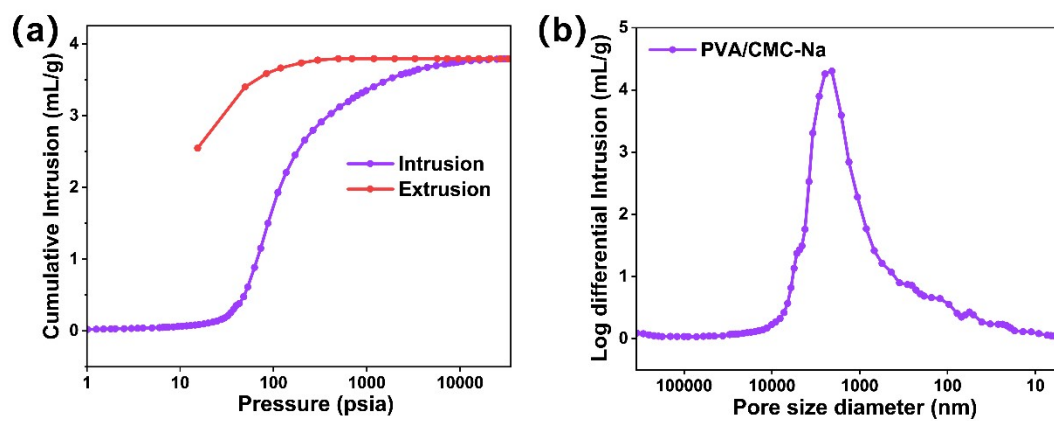

**Fig. S1.** (a) Mercury intrusion curve. (b) Pore size distribution curve

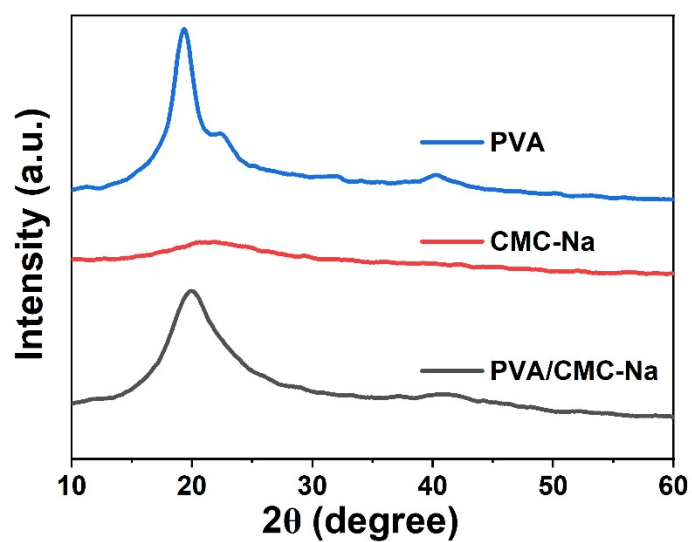

**Fig. S2.** XRD patterns of PVA, CMC-Na, and PVA/CMC-Na composites.

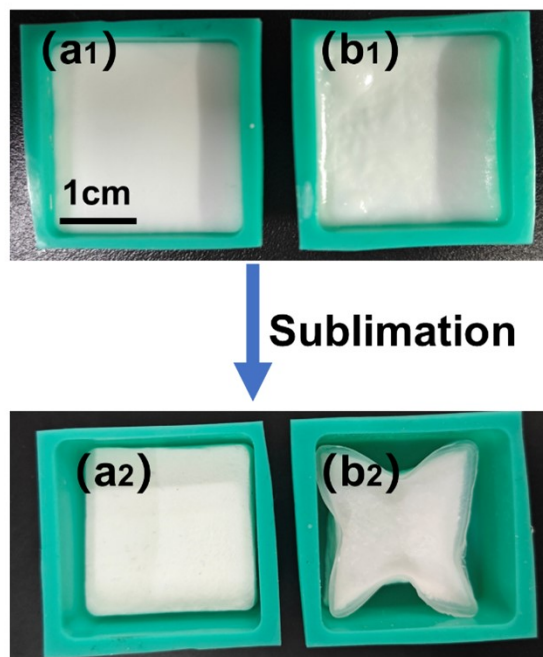

**Fig. S3.** Digital photos of PVA/CMC-Na/PEG after (a<sub>1</sub>) freezing and (a<sub>2</sub>) freeze-drying. Digital photos of PVA/PEG after (b<sub>1</sub>) freezing and (b<sub>2</sub>) freeze-drying.

**Table S2.** Thermal properties of PEG and CPCMs.

|         | $T_m$ (°C) | $\Delta H_m$ (J/g) | $T_c$ (°C) | $\Delta H_c$ (J/g) |
|---------|------------|--------------------|------------|--------------------|
| PEG     | 38.81      | 162.77             | 23.11      | 159.56             |
| PCP-60% | 37.79      | 96.23              | 22.36      | 93.25              |
| PCP-70% | 37.38      | 108.70             | 21.27      | 104.76             |
| PCP-80% | 37.49      | 125.16             | 22.59      | 122.54             |
| PCP-85% | 36.96      | 131.59             | 22.74      | 126.80             |

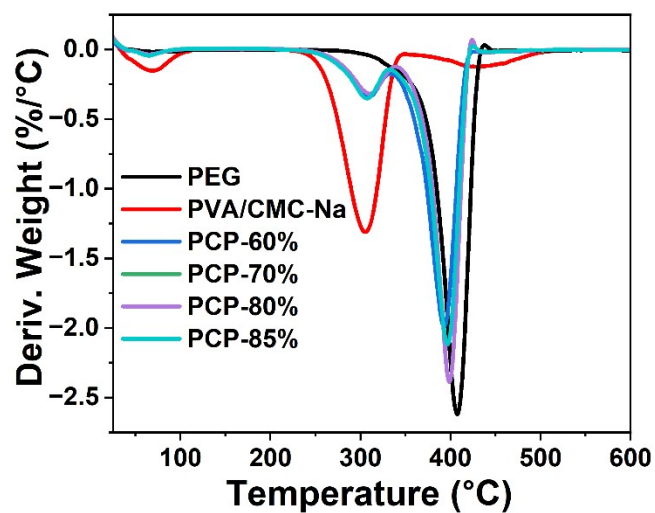

**Fig. S4.** TGA curves of PVA/CMC-Na, PEG, and CPCMs.

**Table S3.** TG data of pure PEG and different CPCMs.

|            | $T_{-5\text{wt}\%}$ (°C) | $T_{\text{max}}$ (°C) | $T_{\text{end}}$ (°C) | Weight loss (wt%) |
|------------|--------------------------|-----------------------|-----------------------|-------------------|
| PEG        | 343.15                   | 367.48                | 427.17                | 1.70              |
| PVA/CMC-Na | 81.03                    | 256.33                | 475.67                | 18.07             |
| PCP-60%    | 292.33                   | 361.78                | 418.30                | 7.12              |
| PCP-70%    | 293.48                   | 362.40                | 420.06                | 5.91              |
| PCP-80%    | 296.37                   | 363.62                | 416.85                | 4.21              |
| PCP-85%    | 293.14                   | 365.23                | 417.11                | 3.73              |

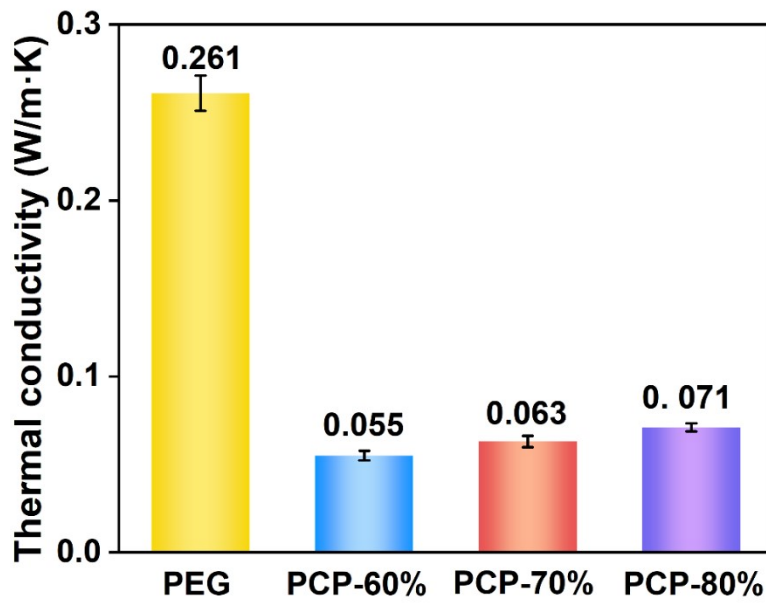

Fig. S5. Thermal conductivities of pure PEG and different CPCMs.

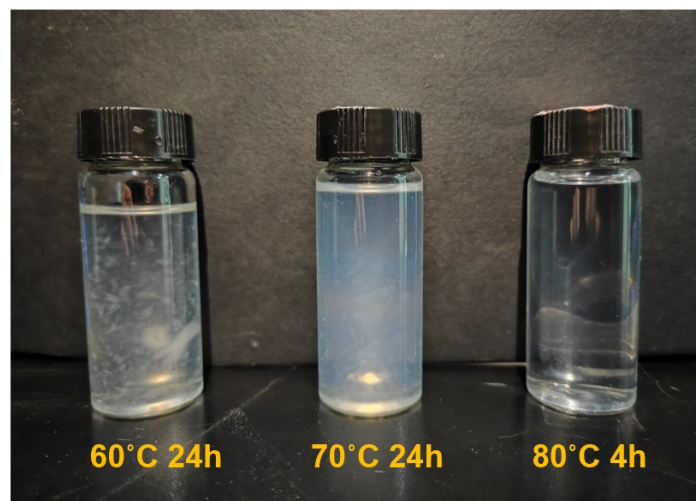

Fig. S6. The dissolution of PCP-80% at different temperatures.

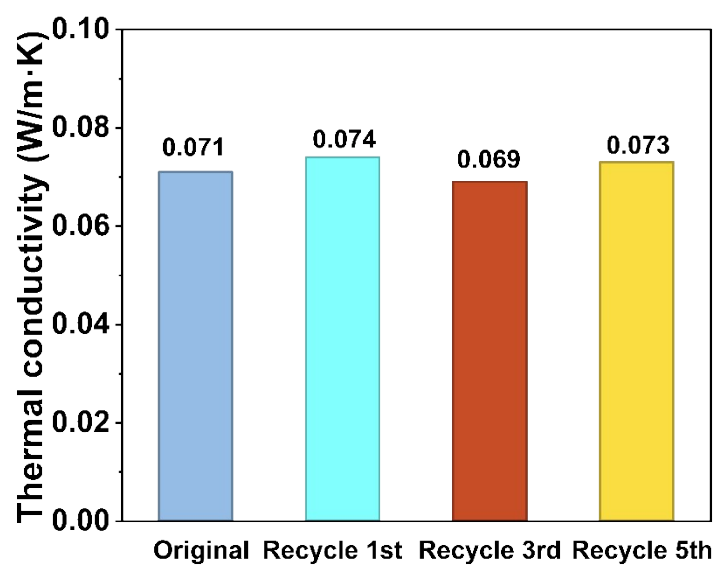

**Fig. S7.** The thermal conductivity of phase transition of R-PCP before and after 5 cycles of recovery.

**Table S4.** The thermal performance of R-PCP during different cycles of recovery.

|             | $T_m$ (°C) | $\Delta H_m$ (J/g) | $T_c$ (°C) | $\Delta H_c$ (J/g) |
|-------------|------------|--------------------|------------|--------------------|
| Original    | 38.33      | 121.18             | 23.26      | 119.55             |
| Recycle 1st | 38.19      | 120.52             | 23.27      | 118.87             |
| Recycle 3rd | 38.52      | 117.26             | 21.42      | 117.94             |
| Recycle 5th | 38.02      | 119.13             | 22.3       | 120.41             |
